# Supplementary material for: Dynamical connections between large marine ecosystems of austral South America based on numerical simulations
Source: Copernicus journal article supplement (doi:10.5194/os-16-271-2020), 2020-03-02
Supplement: Supplementary file 1 [file os-16-271-2020-supplement.pdf]

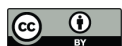

*Supplement of*

## **Dynamical connections between large marine ecosystems of austral South America based on numerical simulations**

**Karen Guihou et al.**

*Correspondence to:* Karen Guihou ([karen.guihou@nlogin.es](mailto:karen.guihou@nlogin.es))

The copyright of individual parts of the supplement might differ from the CC BY 4.0 License.

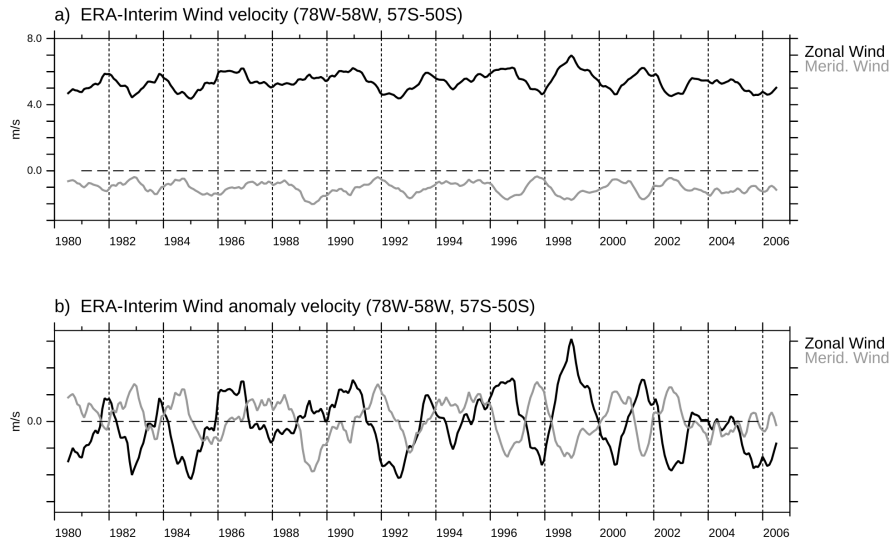

**Figure S1** – Area averaged (78 – 58°W, 57 – 50°S) Era-Interim wind velocity. Wind velocity (panel a) and wind velocity anomalies (panel b). A 12-month running mean is applied to the data to filter the seasonal signal.

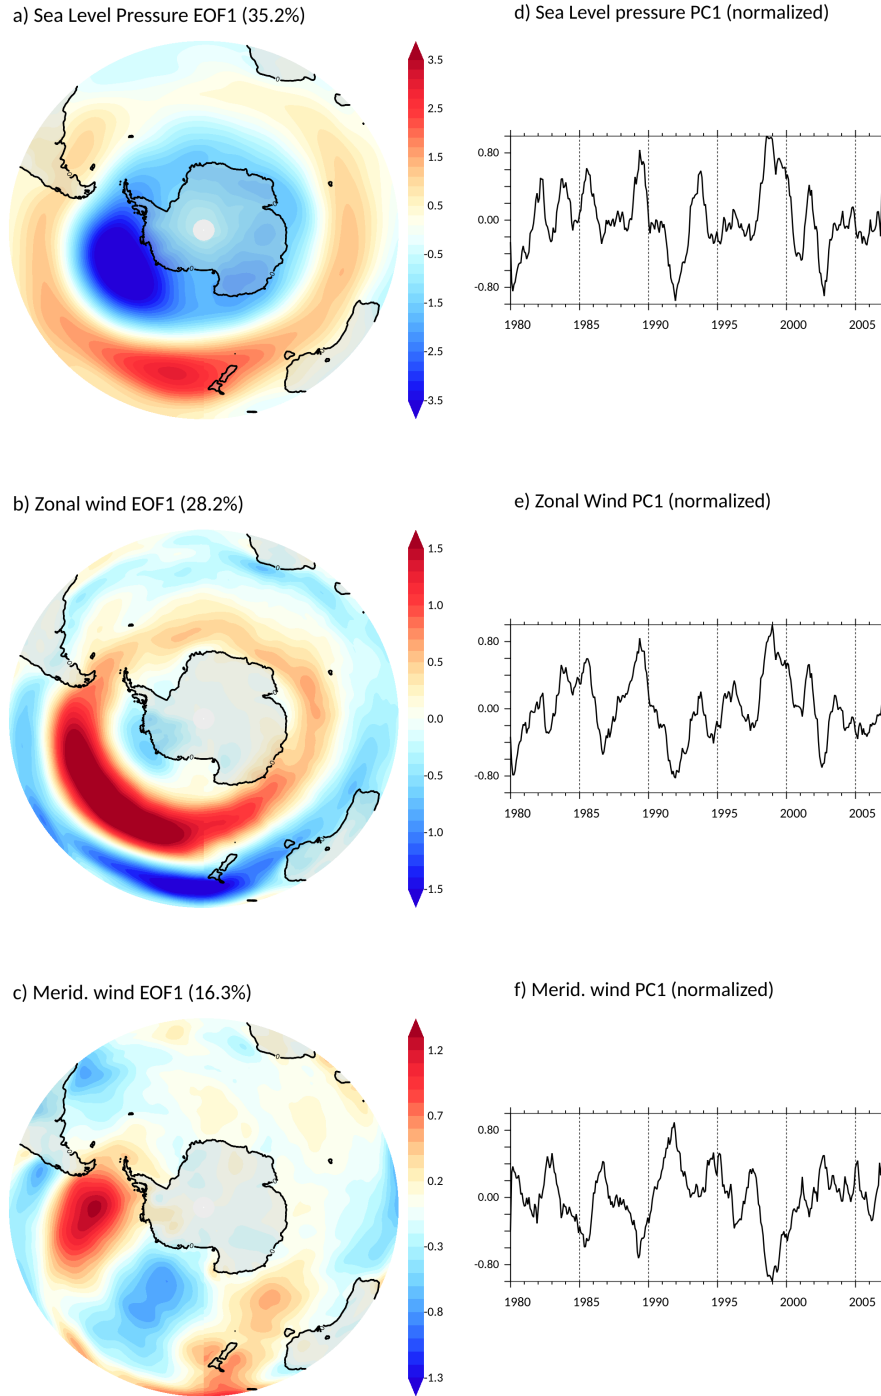

**Figure S2** – First EOF mode of sea-level pressure (a), zonal (b) and meridional (c) wind anomalies and annual means of first EOF mode of sea-level pressure (d), zonal (e) and meridional (f) wind anomalies, south of 20° based on the ERA-Interim reanalysis data during the period 1980-2006. A 12-month running mean is applied to the data to filter the seasonal signal.
